# Supplementary material for: Environmental Enrichment Rescues Social Behavioral Deficits and Synaptic Abnormalities in Pten Haploinsufficient Mice
Source: MDPI journal article supplement (doi:10.3390/genes12091366), 2021-08-30
Supplement: s1 [file s1]

**Supplemental Table S1. Social behavior statistics.** Bold indicates significant effects, italics indicate trends.

| <b>3 Chamber Social Approach</b>                                                                          |                                |                                                |                                                |
|-----------------------------------------------------------------------------------------------------------|--------------------------------|------------------------------------------------|------------------------------------------------|
| <u>Analysis</u>                                                                                           | <u>Effect</u>                  | <u>Statistics in Females</u>                   | <u>Statistics in Males</u>                     |
| 2 (Genotype) x 2 (Condition) x 2 (Chamber)<br>ANOVA (% time in chamber)                                   | genotype                       | $F(1,62)=0.69, p=0.409$                        | $F(1,56)=2.49, p=0.121$                        |
|                                                                                                           | condition                      | <b><math>F(1,62)=5.19, p=0.026</math></b>      | $F(1,56)=0.22, p=0.644$                        |
|                                                                                                           | chamber                        | <b><math>F(1,62)=31.61, p&lt;0.001</math></b>  | <b><math>F(1,56)=48.51, p&lt;0.001</math></b>  |
|                                                                                                           | genotype x condition           | <b><math>F(1,62)=6.09, p=0.016</math></b>      | <b><math>F(1,56)=0.68, p=0.012</math></b>      |
|                                                                                                           | genotype x chamber             | $F(1,62)=2.86, p=0.096$                        | $F(1,56)=2.18, p=0.146$                        |
|                                                                                                           | condition x chamber            | $F(1,62)=1.82, p=0.182$                        | <b><math>F(1,56)=5.46, p=0.023</math></b>      |
|                                                                                                           | genotype x condition x chamber | $F(1,62)<0.01, p=0.960$                        | $F(1,56)=1.73, p=0.194$                        |
| Paired-sample t-test (% time in mouse+tube<br>chamber vs. empty tube chamber): <i>Pten</i> <sup>+/+</sup> | Standard-housed                | <b><math>t(13)=3.03, p=0.010</math></b>        | <b><math>t(14)=3.86, p=0.002</math></b>        |
|                                                                                                           | EE-housed                      | <b><math>t(20)=4.37, p&lt;0.001</math></b>     | $t(14)=0.93, p=0.370$                          |
| Paired-sample t-test (% time in mouse+tube<br>chamber vs. empty tube chamber): <i>Pten</i> <sup>+/-</sup> | Standard-housed                | $t(14)=1.28, p=0.221$                          | <b><math>t(14)=4.57, p&lt;0.001</math></b>     |
|                                                                                                           | EE-housed                      | <b><math>t(15)=2.88, p=0.011</math></b>        | <b><math>t(14)=5.08, p&lt;0.001</math></b>     |
| Paired-sample t-test (distance to mouse+<br>tube vs. distance to empty tube): <i>Pten</i> <sup>+/+</sup>  | Standard-housed                | <b><math>t(13)=3.55, p=0.004</math></b>        | <b><math>t(14)=3.88, p=0.002</math></b>        |
|                                                                                                           | EE-housed                      | <b><math>t(20)=4.27, p&lt;0.001</math></b>     | $t(14)=1.22, p=0.243$                          |
| Paired-sample t-test (distance to mouse+<br>tube vs. distance to empty tube): <i>Pten</i> <sup>+/-</sup>  | Standard-housed                | $t(14)=1.51, p=0.153$                          | <b><math>t(14)=4.69, p&lt;0.001</math></b>     |
|                                                                                                           | EE-housed                      | <b><math>t(15)=2.97, p=0.010</math></b>        | <b><math>t(14)=5.28, p&lt;0.001</math></b>     |
| 2 (condition) x 2 (genotype) ANOVA on<br>Distance Traveled                                                | genotype                       | $F(1,62)=0.93, p=0.339$                        | $F(1,56)=0.08, p=0.782$                        |
|                                                                                                           | condition                      | <b><math>F(1,62)=5.31, p=0.025</math></b>      | <b><math>F(1,56)=18.76, p&lt;0.001</math></b>  |
|                                                                                                           | genotype x condition           | $F(1,62)=1.32, p=0.254$                        | $F(1,56)=3.20, p=0.079$                        |
| Genotype <i>t</i> -test (distance traveled)                                                               | Standard-housed                | $t(27)=0.14, p=0.894$                          | $t(28)=1.01, p=0.323$                          |
|                                                                                                           | EE-housed                      | $t(35)=1.51, p=0.141$                          | $t(28)=1.56, p=0.129$                          |
| Condition <i>t</i> -test (distance traveled)                                                              | <i>Pten</i> <sup>+/+</sup>     | $t(33)=0.96, p=0.344$                          | <b><math>t(28)=4.75, p&lt;0.001</math></b>     |
|                                                                                                           | <i>Pten</i> <sup>+/-</sup>     | <b><math>t(29)=2.12, p=0.043</math></b>        | $t(28)=1.66, p=0.108$                          |
| <b>Social Recognition</b>                                                                                 |                                |                                                |                                                |
| <u>Analysis</u>                                                                                           | <u>Effect</u>                  | <u>Statistics in Females</u>                   | <u>Statistics in Males</u>                     |
| 2 (Genotype) x 2 (Condition) x 5 (Trial)<br>ANOVA                                                         | genotype                       | $F(1,47)=0.19, p=0.669$                        | $F(1,43)=1.30, p=0.261$                        |
|                                                                                                           | condition                      | $F(1,47)=0.67, p=0.418$                        | $F(1,43)=0.35, p=0.557$                        |
|                                                                                                           | trial                          | <b><math>F(4,188)=17.66, p&lt;0.001</math></b> | <b><math>F(4,172)=16.34, p&lt;0.001</math></b> |
|                                                                                                           | genotype x condition           | $F(1,47)=0.85, p=0.362$                        | $F(1,43)=1.32, p=0.258$                        |
|                                                                                                           | genotype x trial               | $F(4,188)=0.79, p=0.534$                       | $F(4,172)=0.32, p=0.867$                       |
|                                                                                                           | condition x trial              | $F(4,188)=1.06, p=0.377$                       | $F(4,172)=0.33, p=0.856$                       |
|                                                                                                           | genotype x condition x trial   | $F(4,188)=1.80, p=0.130$                       | $F(4,172)=0.95, p=0.437$                       |

|                                                    |                      |                                                                                                                                                                                                                                                          |                                                                                                                                                                                                                                                    |
|----------------------------------------------------|----------------------|----------------------------------------------------------------------------------------------------------------------------------------------------------------------------------------------------------------------------------------------------------|----------------------------------------------------------------------------------------------------------------------------------------------------------------------------------------------------------------------------------------------------|
| 2 (Genotype) x 2 (Condition) ANOVA: H1             | genotype             | $F(1,47)=1.35, p=0.252$                                                                                                                                                                                                                                  | $F(1,43)=0.31, p=0.582$                                                                                                                                                                                                                            |
|                                                    | condition            | $F(1,47)=0.28, p=0.601$                                                                                                                                                                                                                                  | $F(1,43)=0.03, p=0.866$                                                                                                                                                                                                                            |
|                                                    | genotype x condition | <b><math>F(1,47)=4.38, p=0.042</math></b>                                                                                                                                                                                                                | $F(1,43)=3.74, p=0.060$                                                                                                                                                                                                                            |
|                                                    | Post hocs            | Std, WT vs $Pten^{+/-}$ : $p=0.471$                                                                                                                                                                                                                      | Std, WT vs $Pten^{+/-}$ : $p=0.155$                                                                                                                                                                                                                |
|                                                    |                      | EE, WT vs $Pten^{+/-}$ : <b><math>p=0.039</math></b>                                                                                                                                                                                                     | EE, WT vs $Pten^{+/-}$ : $p=0.606$                                                                                                                                                                                                                 |
|                                                    |                      | WT, Std vs EE: $p=0.052$                                                                                                                                                                                                                                 | WT, Std vs EE: $p=0.494$                                                                                                                                                                                                                           |
|                                                    |                      | $Pten^{+/-}$ , Std vs EE: $p=0.305$                                                                                                                                                                                                                      | $Pten^{+/-}$ , Std vs EE: $p=0.838$                                                                                                                                                                                                                |
| 2 (Genotype) x 2 (Condition) ANOVA: Test           | genotype             | $F(1,47)=0.05, p=0.830$                                                                                                                                                                                                                                  | $F(1,43)=1.87, p=0.179$                                                                                                                                                                                                                            |
|                                                    | condition            | $F(1,47)=0.92, p=0.343$                                                                                                                                                                                                                                  | $F(1,43)=0.09, p=0.772$                                                                                                                                                                                                                            |
|                                                    | genotype x condition | $F(1,47)=0.93, p=0.340$                                                                                                                                                                                                                                  | $F(1,43)=0.37, p=0.548$                                                                                                                                                                                                                            |
| 2 (Genotype) x 2 (Condition) ANOVA: Habituation    | genotype             | $F(1,47)=2.83, p=0.099$                                                                                                                                                                                                                                  | $F(1,43)=0.30, p=0.586$                                                                                                                                                                                                                            |
|                                                    | condition            | $F(1,47)<0.01, p=0.983$                                                                                                                                                                                                                                  | $F(1,43)=0.28, p=0.601$                                                                                                                                                                                                                            |
|                                                    | genotype x condition | $F(1,47)=2.36, p=0.131$                                                                                                                                                                                                                                  | $F(1,43)=0.25, p=0.620$                                                                                                                                                                                                                            |
| 2 (Genotype) x 2 (Condition) ANOVA: Dishabituation | genotype             | $F(1,47)=0.95, p=0.334$                                                                                                                                                                                                                                  | $F(1,43)<0.01, p=0.962$                                                                                                                                                                                                                            |
|                                                    | condition            | $F(1,47)=0.31, p=0.580$                                                                                                                                                                                                                                  | $F(1,43)=0.09, p=0.771$                                                                                                                                                                                                                            |
|                                                    | genotype x condition | $F(1,47)=1.03, p=0.314$                                                                                                                                                                                                                                  | <b><math>F(1,43)=5.07, p=0.030</math></b>                                                                                                                                                                                                          |
|                                                    | Post hocs            | n/a                                                                                                                                                                                                                                                      | Std, WT vs $Pten^{+/-}$ : $p=0.113$                                                                                                                                                                                                                |
|                                                    |                      | n/a                                                                                                                                                                                                                                                      | EE, WT vs $Pten^{+/-}$ : $p=0.124$                                                                                                                                                                                                                 |
|                                                    |                      | n/a                                                                                                                                                                                                                                                      | WT, Std vs EE: $p=0.057$                                                                                                                                                                                                                           |
|                                                    |                      | n/a                                                                                                                                                                                                                                                      | $Pten^{+/-}$ , Std vs EE: $p=0.204$                                                                                                                                                                                                                |
| Trial ANOVA (H1-H4): Standard-housed $Pten^{+/+}$  | trial                | <b><math>F(3,48)=5.83, p=0.002</math></b>                                                                                                                                                                                                                | <b><math>F(3,42)=9.44, p&lt;0.001</math></b>                                                                                                                                                                                                       |
|                                                    | Post hocs            | Hab 1 vs Hab 2: $p=0.529$<br>Hab 1 vs Hab 3: $p=0.057$<br>Hab 1 vs Hab 4: <b><math>p=0.003</math></b><br>Hab 2 vs Hab 3: $p=0.971$<br>Hab 2 vs Hab 4: $p=0.080$<br>Hab 3 vs Hab 4: $p=0.721$                                                             | Hab 1 vs Hab 2: $p=0.443$<br>Hab 1 vs Hab 3: <b><math>p=0.016</math></b><br>Hab 1 vs Hab 4: <b><math>p=0.031</math></b><br>Hab 2 vs Hab 3: <b><math>p=0.016</math></b><br>Hab 2 vs Hab 4: <b><math>p=0.043</math></b><br>Hab 3 vs Hab 4: $p=0.999$ |
| Trial ANOVA (H1-H4): EE-housed $Pten^{+/+}$        | trial                | <b><math>F(3,33)=20.01, p&lt;0.001</math></b>                                                                                                                                                                                                            | <b><math>F(3,36)=8.08, p&lt;0.001</math></b>                                                                                                                                                                                                       |
|                                                    | Post hocs            | Hab 1 vs Hab 2: $p=0.497$<br>Hab 1 vs Hab 3: <b><math>p&lt;0.001</math></b><br>Hab 1 vs Hab 4: <b><math>p&lt;0.001</math></b><br>Hab 2 vs Hab 3: <b><math>p=0.027</math></b><br>Hab 2 vs Hab 4: <b><math>p=0.013</math></b><br>Hab 3 vs Hab 4: $p=0.838$ | Hab 1 vs Hab 2: $p=0.998$<br>Hab 1 vs Hab 3: <b><math>p=0.009</math></b><br>Hab 1 vs Hab 4: <b><math>p=0.042</math></b><br>Hab 2 vs Hab 3: <b><math>p=0.009</math></b><br>Hab 2 vs Hab 4: $p=0.075$<br>Hab 3 vs Hab 4: $p=1.000$                   |

|                                                                           |                  |                                                                                                                                                                                                                      |                                                                                                                                                                                                                      |
|---------------------------------------------------------------------------|------------------|----------------------------------------------------------------------------------------------------------------------------------------------------------------------------------------------------------------------|----------------------------------------------------------------------------------------------------------------------------------------------------------------------------------------------------------------------|
| Trial ANOVA (H1-H4): Standard-housed <i>Pten</i> <sup>+/-</sup>           | trial            | <b><i>F</i>(3,36)=6.17, <i>p</i>=0.002</b>                                                                                                                                                                           | <b><i>F</i>(3,33)=4.63, <i>p</i>=0.008</b>                                                                                                                                                                           |
|                                                                           | <i>Post hocs</i> | Hab 1 vs Hab 2: <i>p</i> =0.097<br>Hab 1 vs Hab 3: <i>p</i> =0.126<br>Hab 1 vs Hab 4: <b><i>p</i>=0.011</b><br>Hab 2 vs Hab 3: <i>p</i> =0.996<br>Hab 2 vs Hab 4: <i>p</i> =0.311<br>Hab 3 vs Hab 4: <i>p</i> =0.765 | Hab 1 vs Hab 2: <i>p</i> =0.956<br>Hab 1 vs Hab 3: <i>p</i> =0.086<br>Hab 1 vs Hab 4: <i>p</i> =0.205<br>Hab 2 vs Hab 3: <i>p</i> =0.138<br>Hab 2 vs Hab 4: <i>p</i> =0.129<br>Hab 3 vs Hab 4: <i>p</i> =1.000       |
| Trial ANOVA (H1-H4): EE-housed <i>Pten</i> <sup>+/-</sup>                 | trial            | <i>F</i> (3,27)=1.73, <i>p</i> =0.186                                                                                                                                                                                | <b><i>F</i>(3,24)=5.49, <i>p</i>=0.005</b>                                                                                                                                                                           |
|                                                                           | <i>Post hocs</i> | n/a<br>n/a<br>n/a<br>n/a<br>n/a<br>n/a                                                                                                                                                                               | Hab 1 vs Hab 2: <i>p</i> =1.000<br>Hab 1 vs Hab 3: <i>p</i> =0.113<br>Hab 1 vs Hab 4: <i>p</i> =0.129<br>Hab 2 vs Hab 3: <i>p</i> =0.222<br>Hab 2 vs Hab 4: <b><i>p</i>=0.021</b><br>Hab 3 vs Hab 4: <i>p</i> =0.889 |
| Genotype <i>t</i> -test: Standard-housed                                  | H1               | <i>t</i> (28)=0.64, <i>p</i> =0.529                                                                                                                                                                                  | <i>t</i> (25)=1.24, <i>p</i> =0.228                                                                                                                                                                                  |
|                                                                           | Test             | <i>t</i> (28)=0.83, <i>p</i> =0.415                                                                                                                                                                                  | <i>t</i> (23)=1.66, <i>p</i> =0.111                                                                                                                                                                                  |
|                                                                           | Habituation      | <i>t</i> (28)=0.11, <i>p</i> =0.913                                                                                                                                                                                  | <i>t</i> (25)=0.63, <i>p</i> =0.532                                                                                                                                                                                  |
|                                                                           | Dishabituation   | <i>t</i> (28)=1.78, <i>p</i> =0.087                                                                                                                                                                                  | <i>t</i> (23)=1.36, <i>p</i> =0.188                                                                                                                                                                                  |
| Genotype <i>t</i> -test: EE-housed                                        | H1               | <i>t</i> (23)=1.36, <i>p</i> =0.186                                                                                                                                                                                  | <i>t</i> (20)=0.70, <i>p</i> =0.494                                                                                                                                                                                  |
|                                                                           | Test             | <i>t</i> (21)=0.42, <i>p</i> =0.680                                                                                                                                                                                  | <i>t</i> (20)=1.08, <i>p</i> =0.292                                                                                                                                                                                  |
|                                                                           | Habituation      | <i>t</i> (23)=1.62, <i>p</i> =0.119                                                                                                                                                                                  | <i>t</i> (20)=0.05, <i>p</i> =0.964                                                                                                                                                                                  |
|                                                                           | Dishabituation   | <i>t</i> (21)=0.02, <i>p</i> =0.983                                                                                                                                                                                  | <b><i>t</i>(20)=2.18, <i>p</i>=0.041</b>                                                                                                                                                                             |
| Condition <i>t</i> -test: <i>Pten</i> <sup>+/+</sup>                      | H1               | <b><i>t</i>(27)=2.34, <i>p</i>=0.027</b>                                                                                                                                                                             | <i>t</i> (26)=0.70, <i>p</i> =0.490                                                                                                                                                                                  |
|                                                                           | Test             | <i>t</i> (27)<0.01, <i>p</i> =0.997                                                                                                                                                                                  | <i>t</i> (25)=1.23, <i>p</i> =0.231                                                                                                                                                                                  |
|                                                                           | Habituation      | <i>t</i> (27)=1.24, <i>p</i> =0.224                                                                                                                                                                                  | <i>t</i> (26)=0.90, <i>p</i> =0.376                                                                                                                                                                                  |
|                                                                           | Dishabituation   | <i>t</i> (27)=0.38, <i>p</i> =0.706                                                                                                                                                                                  | <i>t</i> (25)=1.67, <i>p</i> =0.108                                                                                                                                                                                  |
| Condition <i>t</i> -test: <i>Pten</i> <sup>+/-</sup>                      | H1               | <i>t</i> (24)=0.06, <i>p</i> =0.953                                                                                                                                                                                  | <i>t</i> (19)=0.11, <i>p</i> =0.913                                                                                                                                                                                  |
|                                                                           | Test             | <i>t</i> (22)=1.41, <i>p</i> =0.173                                                                                                                                                                                  | <i>t</i> (18)=1.66, <i>p</i> =0.114                                                                                                                                                                                  |
|                                                                           | Habituation      | <i>t</i> (24)=0.48, <i>p</i> =0.638                                                                                                                                                                                  | <i>t</i> (19)=0.19, <i>p</i> =0.850                                                                                                                                                                                  |
|                                                                           | Dishabituation   | <i>t</i> (22)=1.04, <i>p</i> =0.310                                                                                                                                                                                  | <i>t</i> (18)=1.85, <i>p</i> =0.080                                                                                                                                                                                  |
| One-sample <i>t</i> -test (habituation vs. 0): <i>Pten</i> <sup>+/+</sup> | Standard-housed  | <b><i>t</i>(16)=4.38, <i>p</i>&lt;0.001</b>                                                                                                                                                                          | <b><i>t</i>(14)=3.30, <i>p</i>=0.005</b>                                                                                                                                                                             |
|                                                                           | EE-housed        | <b><i>t</i>(11)=7.17, <i>p</i>&lt;0.001</b>                                                                                                                                                                          | <b><i>t</i>(12)=3.24, <i>p</i>=0.007</b>                                                                                                                                                                             |
| One-sample <i>t</i> -test (habituation vs. 0): <i>Pten</i> <sup>+/-</sup> | Standard-housed  | <b><i>t</i>(12)=3.98, <i>p</i>=0.002</b>                                                                                                                                                                             | <b><i>t</i>(11)=2.36, <i>p</i>=0.038</b>                                                                                                                                                                             |
|                                                                           | EE-housed        | <b><i>t</i>(12)=2.37, <i>p</i>=0.035</b>                                                                                                                                                                             | <b><i>t</i>(8)=2.81, <i>p</i>=0.023</b>                                                                                                                                                                              |

|                                                                                 |                 |                                          |                                         |
|---------------------------------------------------------------------------------|-----------------|------------------------------------------|-----------------------------------------|
| One-sample <i>t</i> -test (dishabituation vs. 0):<br><i>Pten</i> <sup>+/+</sup> | Standard-housed | <b><i>t</i>(16)=3.65, <i>p</i>=0.002</b> | <i>t</i> (13)=1.87, <i>p</i> =0.084     |
|                                                                                 | EE-housed       | <b><i>t</i>(11)=2.57, <i>p</i>=0.026</b> | <i>t</i> (12)=0.23, <i>p</i> =0.821     |
| One-sample <i>t</i> -test (dishabituation vs. 0):<br><i>Pten</i> <sup>+/-</sup> | Standard-housed | <i>t</i> (12)=1.07, <i>p</i> =0.305      | <i>t</i> (10)=0.18, <i>p</i> =0.862     |
|                                                                                 | EE-housed       | <i>t</i> (10)=1.77, <i>p</i> =0.107      | <b><i>t</i>(8)=4.40, <i>p</i>=0.002</b> |
