# Supplementary material for: Environmental Enrichment Rescues Social Behavioral Deficits and Synaptic Abnormalities in Pten Haploinsufficient Mice
Source: MDPI journal article supplement (doi:10.3390/genes12091366), 2021-08-30
Supplement: s1 [file s1]

**Supplemental Table S2. Non-social behavior statistics.** Bold indicates significant effects, italics indicate trends.

| Marble Burying                                              |                                    |                                                     |                                                                       |
|-------------------------------------------------------------|------------------------------------|-----------------------------------------------------|-----------------------------------------------------------------------|
| Analysis                                                    | Effect                             | Statistics in Females                               | Statistics in Males                                                   |
| 2 (genotype) x 2 (condition) ANOVA on % marbles 2/3+ buried | genotype                           | $F(1,65) < 0.01, p = 0.999$                         | <b><math>F(1,56) = 7.51, p = 0.008</math></b>                         |
|                                                             | condition                          | $F(1,65) = 0.04, p = 0.834$                         | $F(1,56) = 0.66, p = 0.420$                                           |
|                                                             | genotype x condition               | $F(1,65) = 1.79, p = 0.186$                         | $F(1,56) = 1.24, p = 0.270$                                           |
| Genotype <i>t</i> -test (% marbles 2/3+ buried)             | Standard-housed                    | $t(29) = 1.02, p = 0.319$                           | <b><math>t(28) = 3.09, p = 0.004</math></b>                           |
|                                                             | EE-housed                          | $t(36) = 0.92, p = 0.365$                           | $t(28) = 1.04, p = 0.307$                                             |
| Condition <i>t</i> -test (% marbles 2/3+ buried)            | <i>Pten</i> <sup>+/+</sup>         | $t(36) = 0.79, p = 0.436$                           | $t(28) = 0.24, p = 0.815$                                             |
|                                                             | <i>Pten</i> <sup>+/-</sup>         | $t(29) = 1.14, p = 0.264$                           | $t(28) = 1.25, p = 0.222$                                             |
| Open Field Test                                             |                                    |                                                     |                                                                       |
| Analysis                                                    | Effect                             | Statistics in Females                               | Statistics in Males                                                   |
| 2 (Genotype) x 2 (Condition) x 2 (Thigmotaxis) ANOVA        | genotype                           | $F(1,67) = 0.56, p = 0.456$                         | $F(1,55) = 0.48, p = 0.490$                                           |
|                                                             | condition                          | $F(1,67) = 2.16, p = 0.146$                         | $F(1,55) = 2.02, p = 0.161$                                           |
|                                                             | thigmotaxis                        | <b><math>F(1,67) = 3094.75, p &lt; 0.001</math></b> | <b><math>F(1,55) = 3550.69, p &lt; 0.001</math></b>                   |
|                                                             | genotype x condition               | $F(1,67) = 0.19, p = 0.663$                         | $F(1,55) = 0.27, p = 0.608$                                           |
|                                                             | genotype x thigmotaxis             | $F(1,67) = 1.13, p = 0.291$                         | $F(1,55) = 0.28, p = 0.602$                                           |
|                                                             | condition x thigmotaxis            | $F(1,67) = 1.98, p = 0.163$                         | $F(1,55) = 0.06, p = 0.810$                                           |
|                                                             | genotype x condition x thigmotaxis | $F(1,67) = 0.52, p = 0.473$                         | $F(1,55) = 0.01, p = 0.938$                                           |
| 2 (Genotype) x 2 (Condition) ANOVA: % center time           | genotype                           | $F(1,67) = 1.15, p = 0.288$                         | $F(1,55) = 0.13, p = 0.719$                                           |
|                                                             | condition                          | $F(1,67) = 1.95, p = 0.168$                         | $F(1,55) = 0.25, p = 0.619$                                           |
|                                                             | genotype x condition               | $F(1,67) = 0.53, p = 0.471$                         | $F(1,55) < 0.01, p = 0.976$                                           |
| 2 (Genotype) x 2 (Condition) ANOVA: distance traveled       | genotype                           | $F(1,67) = 0.36, p = 0.549$                         | $F(1,55) = 0.14, p = 0.714$                                           |
|                                                             | condition                          | <b><math>F(1,67) = 14.03, p &lt; 0.001</math></b>   | <b><math>F(1,55) = 5.84, p = 0.019</math></b>                         |
|                                                             | genotype x condition               | $F(1,67) = 0.04, p = 0.834$                         | <b><math>F(1,55) = 6.52, p = 0.013</math></b>                         |
|                                                             | <i>Post hocs</i>                   | n/a                                                 | Std, WT vs <i>Pten</i> <sup>+/-</sup> : $p = 0.125$                   |
|                                                             |                                    | n/a                                                 | EE, WT vs <i>Pten</i> <sup>+/-</sup> : <b><math>p = 0.045</math></b>  |
|                                                             |                                    | n/a                                                 | WT, Std vs EE: $p = 0.924$                                            |
|                                                             |                                    | n/a                                                 | <i>Pten</i> <sup>+/-</sup> , Std vs EE: <b><math>p = 0.001</math></b> |
| Genotype <i>t</i> -test: Standard-housed                    | % center time                      | $t(30) = 0.25, p = 0.801$                           | $t(28) = 0.30, p = 0.769$                                             |
|                                                             | distance traveled                  | $t(30) = 0.47, p = 0.641$                           | $t(28) = 1.46, p = 0.155$                                             |
| Genotype <i>t</i> -test: EE-housed                          | % center time                      | $t(37) = 1.26, p = 0.216$                           | $t(27) = 0.24, p = 0.816$                                             |
|                                                             | distance traveled                  | $t(37) = 0.35, p = 0.732$                           | <b><math>t(27) = 2.21, p = 0.036</math></b>                           |

|                                                                                            |                   |                                              |                                              |
|--------------------------------------------------------------------------------------------|-------------------|----------------------------------------------|----------------------------------------------|
| Condition <i>t</i> -test: <i>Pten</i> <sup>+/-</sup>                                       | % center time     | <i>t</i> (37)=1.79, <i>p</i> =0.082          | <i>t</i> (27)=0.34, <i>p</i> =0.737          |
|                                                                                            | distance traveled | <b><i>t</i>(37)=2.94, <i>p</i>=0.006</b>     | <i>t</i> (27)=0.11, <i>p</i> =0.911          |
| Condition <i>t</i> -test: <i>Pten</i> <sup>+/-</sup>                                       | % center time     | <i>t</i> (30)=0.40, <i>p</i> =0.691          | <i>t</i> (28)=0.37, <i>p</i> =0.716          |
|                                                                                            | distance traveled | <b><i>t</i>(30)=2.39, <i>p</i>=0.023</b>     | <b><i>t</i>(28)=3.15, <i>p</i>=0.004</b>     |
| Paired-sample <i>t</i> -test (% time in center vs thigmotaxis): <i>Pten</i> <sup>+/+</sup> | Standard-housed   | <b><i>t</i>(16)=38.60, <i>p</i>&lt;0.001</b> | <b><i>t</i>(14)=33.75, <i>p</i>&lt;0.001</b> |
|                                                                                            | EE-housed         | <b><i>t</i>(21)=30.08, <i>p</i>&lt;0.001</b> | <b><i>t</i>(13)=27.44, <i>p</i>&lt;0.001</b> |
| Paired-sample <i>t</i> -test (% time in center vs thigmotaxis): <i>Pten</i> <sup>+/-</sup> | Standard-housed   | <b><i>t</i>(14)=24.17, <i>p</i>&lt;0.001</b> | <b><i>t</i>(14)=37.31, <i>p</i>&lt;0.001</b> |
|                                                                                            | EE-housed         | <b><i>t</i>(16)=23.92, <i>p</i>&lt;0.001</b> | <b><i>t</i>(14)=24.90, <i>p</i>&lt;0.001</b> |
