# Supplementary material for: Environmental Enrichment Rescues Social Behavioral Deficits and Synaptic Abnormalities in Pten Haploinsufficient Mice
Source: MDPI journal article supplement (doi:10.3390/genes12091366), 2021-08-30
Supplement: s1 [file s1]

**Supplemental Table S3. Statistics for post-mortem analyses.** Bold indicates significant effects, italics indicate trends.

| Brain, Body Mass                                       |                      |                                                               |                                          |
|--------------------------------------------------------|----------------------|---------------------------------------------------------------|------------------------------------------|
| Analysis                                               | Effect               | Statistics in Females                                         | Statistics in Males                      |
| 2 (Genotype) x 2 (Condition) ANOVA:<br>brain mass      | genotype             | <b><i>F(1,63)=115.34, p&lt;0.001</i></b>                      | <b><i>F(1,53)=466.24, p&lt;0.001</i></b> |
|                                                        | condition            | <i>F(1,63)=0.62, p=0.435</i>                                  | <i>F(1,53)=0.62, p=0.436</i>             |
|                                                        | genotype x condition | <i>F(1,63)=0.87, p=0.356</i>                                  | <i>F(1,53)=0.87, p=0.354</i>             |
| 2 (Genotype) x 2 (Condition) ANOVA:<br>body mass       | genotype             | <b><i>F(1,63)=15.77, p&lt;0.001</i></b>                       | <b><i>F(1,53)=9.17, p=0.004</i></b>      |
|                                                        | condition            | <i>F(1,63)=1.46, p=0.231</i>                                  | <i>F(1,53)=3.36, p=0.072</i>             |
|                                                        | genotype x condition | <i>F(1,63)=2.77, p=0.101</i>                                  | <i>F(1,53)=0.32, p=0.577</i>             |
| 2 (Genotype) x 2 (Condition) ANOVA:<br>brain % of body | genotype             | <b><i>F(1,63)=32.00, p&lt;0.001</i></b>                       | <b><i>F(1,53)=27.95, p&lt;0.001</i></b>  |
|                                                        | condition            | <i>F(1,63)=2.21, p=0.143</i>                                  | <i>F(1,53)=3.99, p=0.051</i>             |
|                                                        | genotype x condition | <i>F(1,63)=0.07, p=0.798</i>                                  | <i>F(1,53)=0.02, p=0.891</i>             |
| Genotype <i>t</i> -test: Standard-housed               | brain mass           | <b><i>t(29)=7.06, p&lt;0.001</i></b>                          | <b><i>t(26)=13.51, p&lt;0.001</i></b>    |
|                                                        | body mass            | <b><i>t(29)=3.41, p=0.002</i></b>                             | <i>t(26)=1.33, p=0.195</i>               |
|                                                        | brain % of body      | <b><i>t(29)=3.56, p=0.001</i></b>                             | <b><i>t(26)=3.56, p=0.002</i></b>        |
| Genotype <i>t</i> -test: EE-housed                     | brain mass           | <b><i>t(34)=8.24, p&lt;0.001</i></b>                          | <b><i>t(28)=16.61, p&lt;0.001</i></b>    |
|                                                        | body mass            | <i>t(34)=1.94, p=0.061</i>                                    | <b><i>t(28)=3.19, p=0.004</i></b>        |
|                                                        | brain % of body      | <b><i>t(34)=4.48, p&lt;0.001</i></b>                          | <b><i>t(28)=3.93, p=0.001</i></b>        |
| Condition <i>t</i> -test: <i>Pten</i> <sup>+/+</sup>   | brain mass           | <i>t(36)=1.22, p=0.230</i>                                    | <i>t(26)=0.39, p=0.702</i>               |
|                                                        | body mass            | <i>t(36)=0.39, p=0.702</i>                                    | <i>t(26)=1.74, p=0.093</i>               |
|                                                        | brain % of body      | <i>t(36)=0.97, p=0.341</i>                                    | <i>t(26)=1.35, p=0.188</i>               |
| Condition <i>t</i> -test: <i>Pten</i> <sup>+/-</sup>   | brain mass           | <i>t(27)=0.11, p=0.916</i>                                    | <i>t(28)=1.30, p=0.204</i>               |
|                                                        | body mass            | <i>t(27)=1.70, p=0.101</i>                                    | <i>t(28)=1.00, p=0.324</i>               |
|                                                        | brain % of body      | <i>t(27)=1.11, p=0.278</i>                                    | <i>t(28)=1.48, p=0.151</i>               |
| Synaptosomal Western Blot                              |                      |                                                               |                                          |
| Analysis                                               | Effect               | Statistics                                                    |                                          |
| 2 (Genotype) x 2 (Condition) ANOVA:<br>vGluT1/β-actin  | genotype             | <i>F(1,29)=0.08, p=0.786</i>                                  |                                          |
|                                                        | condition            | <i>F(1,29)=0.02, p=0.889</i>                                  |                                          |
|                                                        | genotype x condition | <b><i>F(1,29)=5.83, p=0.022</i></b>                           |                                          |
|                                                        | <i>Post hoc</i>      | Std, WT vs <i>Pten</i> <sup>+/-</sup> : <b><i>p=0.015</i></b> |                                          |
|                                                        |                      | EE, WT vs <i>Pten</i> <sup>+/-</sup> : <i>p=0.220</i>         |                                          |
|                                                        |                      | WT, Std vs EE: <i>p=0.108</i>                                 |                                          |
|                                                        |                      | <i>Pten</i> <sup>+/-</sup> , Std vs EE: <i>p=0.090</i>        |                                          |

|                                                                 |                          |                                         |
|-----------------------------------------------------------------|--------------------------|-----------------------------------------|
| 2 (Genotype) x 2 (Condition) ANOVA:<br>vGAT/ $\beta$ -actin     | genotype                 | $F(1,29)=0.50, p=0.486$                 |
|                                                                 | condition                | $F(1,29)=2.18, p=0.151$                 |
|                                                                 | genotype x condition     | $F(1,29)=0.44, p=0.513$                 |
| 2 (Genotype) x 2 (Condition) ANOVA:<br>PSD-95/ $\beta$ -actin   | genotype                 | $F(1,29)=0.10, p=0.756$                 |
|                                                                 | condition                | $F(1,29)=1.37, p=0.251$                 |
|                                                                 | genotype x condition     | $F(1,29)=1.88, p=0.181$                 |
| 2 (Genotype) x 2 (Condition) ANOVA:<br>gephyrin/ $\beta$ -actin | genotype                 | $F(1,29)=0.01, p=0.924$                 |
|                                                                 | condition                | $F(1,29)=1.88, p=0.181$                 |
|                                                                 | genotype x condition     | $F(1,29)=0.58, p=0.454$                 |
| Genotype <i>t</i> -test: Standard-housed                        | vGluT1/ $\beta$ -actin   | <b><math>t(23)=2.67, p=0.014</math></b> |
|                                                                 | vGAT/ $\beta$ -actin     | <b><math>t(23)=2.17, p=0.041</math></b> |
|                                                                 | PSD-95/ $\beta$ -actin   | $t(23)=1.67, p=0.110$                   |
|                                                                 | gephyrin/ $\beta$ -actin | $t(23)=0.60, p=0.554$                   |
| Genotype <i>t</i> -test: EE-housed                              | vGluT1/ $\beta$ -actin   | $t(8)=1.44, p=0.192$                    |
|                                                                 | vGAT/ $\beta$ -actin     | $t(8)=0.02, p=0.989$                    |
|                                                                 | PSD-95/ $\beta$ -actin   | $t(8)=0.57, p=0.589$                    |
|                                                                 | gephyrin/ $\beta$ -actin | $t(8)=0.64, p=0.546$                    |
| Condition <i>t</i> -test: <i>Pten</i> <sup>+/+</sup>            | vGluT1/ $\beta$ -actin   | $t(15)=1.79, p=0.094$                   |
|                                                                 | vGAT/ $\beta$ -actin     | $t(15)=1.46, p=0.165$                   |
|                                                                 | PSD-95/ $\beta$ -actin   | $t(15)=1.79, p=0.096$                   |
|                                                                 | gephyrin/ $\beta$ -actin | $t(15)=1.74, p=0.105$                   |
| Condition <i>t</i> -test: <i>Pten</i> <sup>+/-</sup>            | vGluT1/ $\beta$ -actin   | $t(15)=1.76, p=0.098$                   |
|                                                                 | vGAT/ $\beta$ -actin     | $t(15)=0.60, p=0.559$                   |
|                                                                 | PSD-95/ $\beta$ -actin   | $t(15)=0.14, p=0.890$                   |
|                                                                 | gephyrin/ $\beta$ -actin | $t(15)=0.39, p=0.704$                   |
